# Supplementary material
Source: PubMed Central journal article supplement (PMC5023513)
Supplement: mol-22-15_235_Borger_Suppl.pdf [file mol-22-15_235_Borger_Suppl.pdf]

## Supplemental Data

# Generation of HLA-Universal iPSC-Derived Megakaryocytes and Platelets for Survival Under Refractoriness Conditions

Ann-Kathrin Börger,<sup>1,5\*</sup> Dorothee Eicke,<sup>1,5\*</sup> Christina Wolf,<sup>1</sup> Christiane Gras,<sup>1,5</sup> Susanne Aufderbeck,<sup>1</sup> Kai Schulze,<sup>2</sup> Lena Engels,<sup>3,5</sup> Britta Eiz-Vesper,<sup>1</sup> Axel Schambach,<sup>4,5</sup> Carlos A Guzman,<sup>2,5</sup> Nico Lachmann,<sup>4,5</sup> Thomas Moritz,<sup>4,5</sup> Ulrich Martin,<sup>3,5</sup> Rainer Blasczyk,<sup>1,5</sup> and Constança Figueiredo<sup>1,5</sup>

Online address: <http://www.molmed.org>

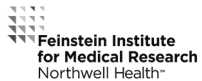

## MATERIAL AND METHODS

### Generation of HLA-Universal iPSCs Using a GMP-Conform Vector

To develop a system closer to good manufacturing practice (GMP) conditions, the expression cassette encoding sh $\beta$ 2m was cloned into the lentiviral vector pRRL.PPT.SF.DsRed.pre. The SF.DsRed expression cassette was replaced with the sequence encoding for the truncated form of the low-affinity nerve growth factor receptor ( $\Delta$ LNGFR) [19] under the control of the elongation factor-1 $\alpha$ -short (EFS) promoter. For the production of pRRL.PPT.EFS. $\Delta$ LNGFR.sh $\beta$ 2m.pre (sh $\beta$ 2m-pRRL) lentiviral particles, the safety-enhanced “third-generation” split plasmid packaging system [20] and the pMD2G plasmid encoding for VSVg envelope protein were used. Transduction efficiency was calculated by assessing the percentage of  $\Delta$ LNGFR-expressing cells, quantified via flow cytometry using an anti-CD271 antibody labeled with APC (Miltenyi Biotec).

### Generation and Characterization of HLA-Universal MKs and PLTs

For the differentiation of MKs and PLTs from sh $\beta$ 2m-pRRL-iPSCs the protocol as described in the main manuscript was applied. MK and PLT differentiation rates of iPSCs transduced either with

sh $\beta$ 2m-pRRL or sh $\beta$ 2m-pLVTHm were compared.

## RESULTS

### Generation of HLA-Universal MKs Using a GMP-Conform Lentiviral Vector

For the differentiation of iPSCs to MKs, cell lines expressing sh $\beta$ 2m either encoded in pLVTHm or pRRL are cultured for 33 d and were monitored every week for expression of MK markers. On d 19 47.5%  $\pm$  4.8 and 40.8%  $\pm$  17.7 CD41<sup>+</sup> CD42a<sup>+</sup>CD61<sup>+</sup> cells were detected for sh $\beta$ 2m-pLVTHm and sh $\beta$ 2m-pRRL, respectively (Supplementary Figure 4A and 4B). For this experiment five independent differentiations comparing the two vectors were done separately, revealing no significant change in differentiation efficiency ( $p = 0.493$ ).

### Differentiation of HLA-Universal PLTs

Starting on d 19 the supernatant of the ongoing differentiations was harvested and analyzed for the PLT content. On d 26, 76.2%  $\pm$  16.21 of the sh $\beta$ 2m-pLVTHm-derived and 80.6%  $\pm$  10.6 sh $\beta$ 2m-pRRL-derived CD41<sup>+</sup> cells were double positive for CD42a and CD61 (Supplementary Figure 5A and 5B). Comparing the differentiation efficiencies of the HLA-universal iPSCs with pLVTHm and pRRL, no significant change could be detected ( $p = 0.602$ ).

A

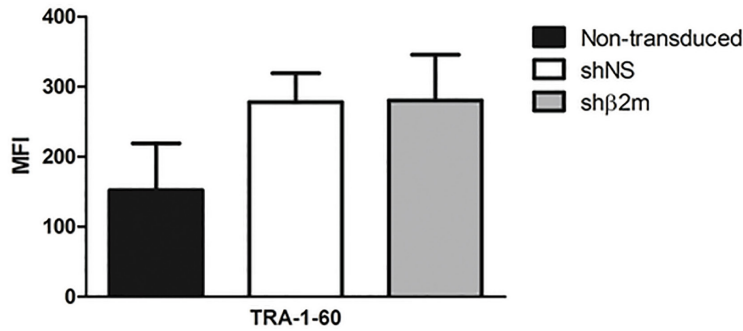

B

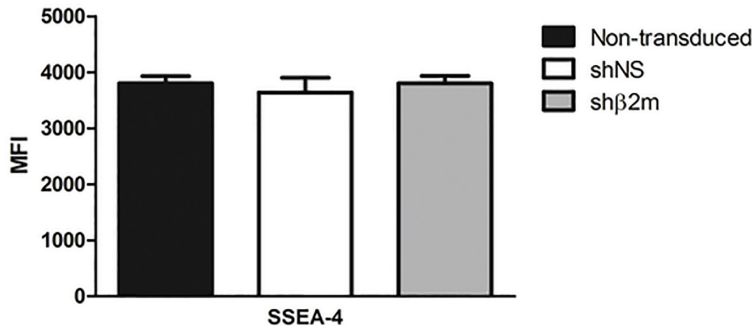

**Supplementary Figure S1.** HLA-universal iPSCs express pluripotency markers. iPSCs were transduced with shRNAs (NS or β2m-specific) encoded either by pLVTHm or pRRL.PPT.EFS.dLNGFR.pre (pRRL). The graph shows mean and SD of the mean fluorescence intensities of (A) TRA-1-60 and (B) SSEA-4 expression of HLA-universal iPSCs as detected by flow cytometry in three independent experiments.

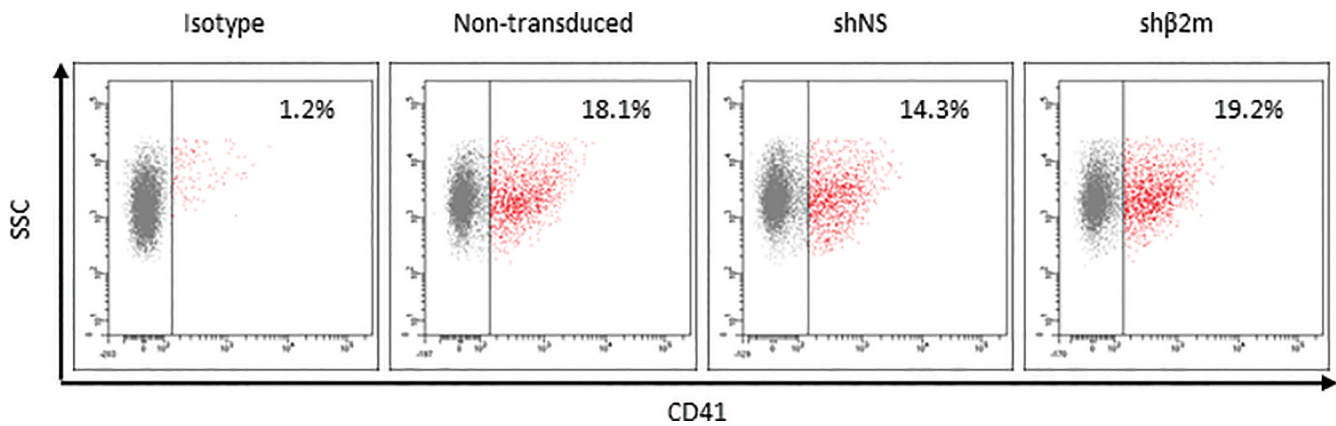

**Supplementary Figure S2.** Characterization of iPSC-derived platelets (PLTs). PLTs were derived from iPSCs, which were non-transduced or expressing either a shRNA targeting β2-microglobulin (shβ2m) or a non-specific shRNA (shNS). PLTs were analyzed weekly starting from d 19 for their expression of CD41+ (GPIIb) population. This CD41+ population was further analyzed for the co-expression of CD42a+ (GPIX) CD61+ (GPIIa) (Figure 5). Representative flow cytometry dot plots are shown for each condition on d 19 of differentiation.

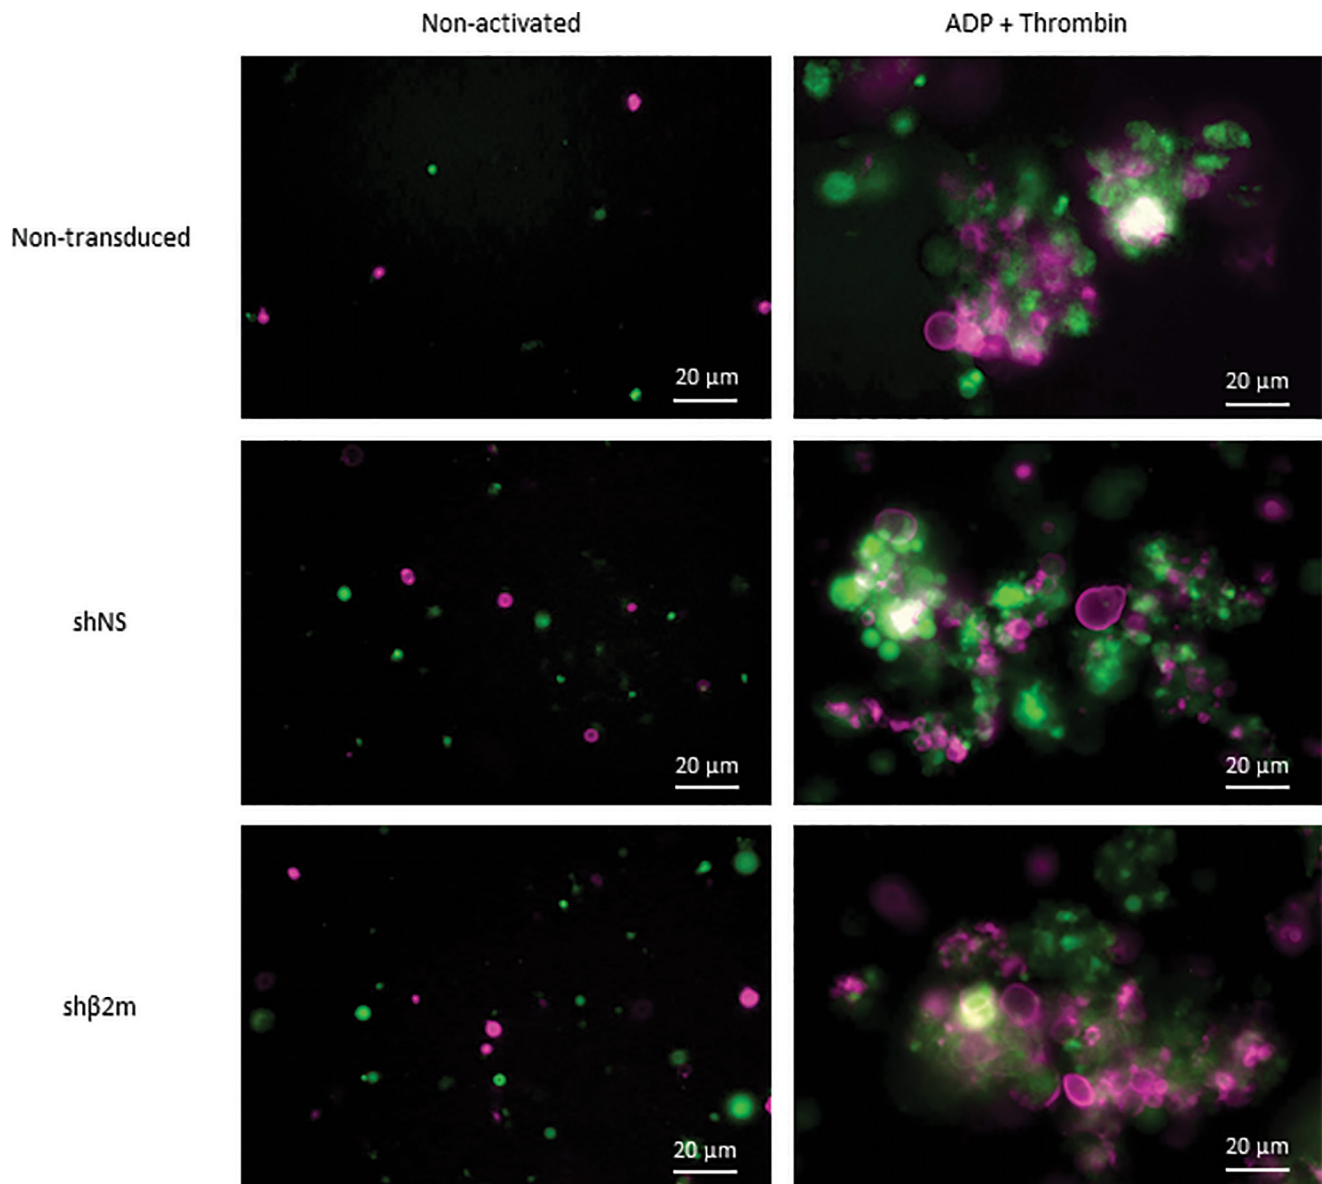

**Supplementary Figure S3.** HLA-universal platelets (PLTs) aggregate after stimulation. HLA universal PLTs derived from iPSCs were harvested and split in two fractions; one was labeled with FITC-conjugated anti-CD61 (GPIIb/IIIa) antibody (green) and the other with APC-conjugated anti-CD11a antibody (red). After staining, cell fractions were mixed together and again divided in a sample for stimulation with PLT agonists (ADP + thrombin) and a sample for control (non-stimulated). The figure shows fluorescence microscopy images before and after stimulation of PLTs derived from non-transduced iPSCs as well as from transduced iPSCs either expressing shNS or shβ2m.

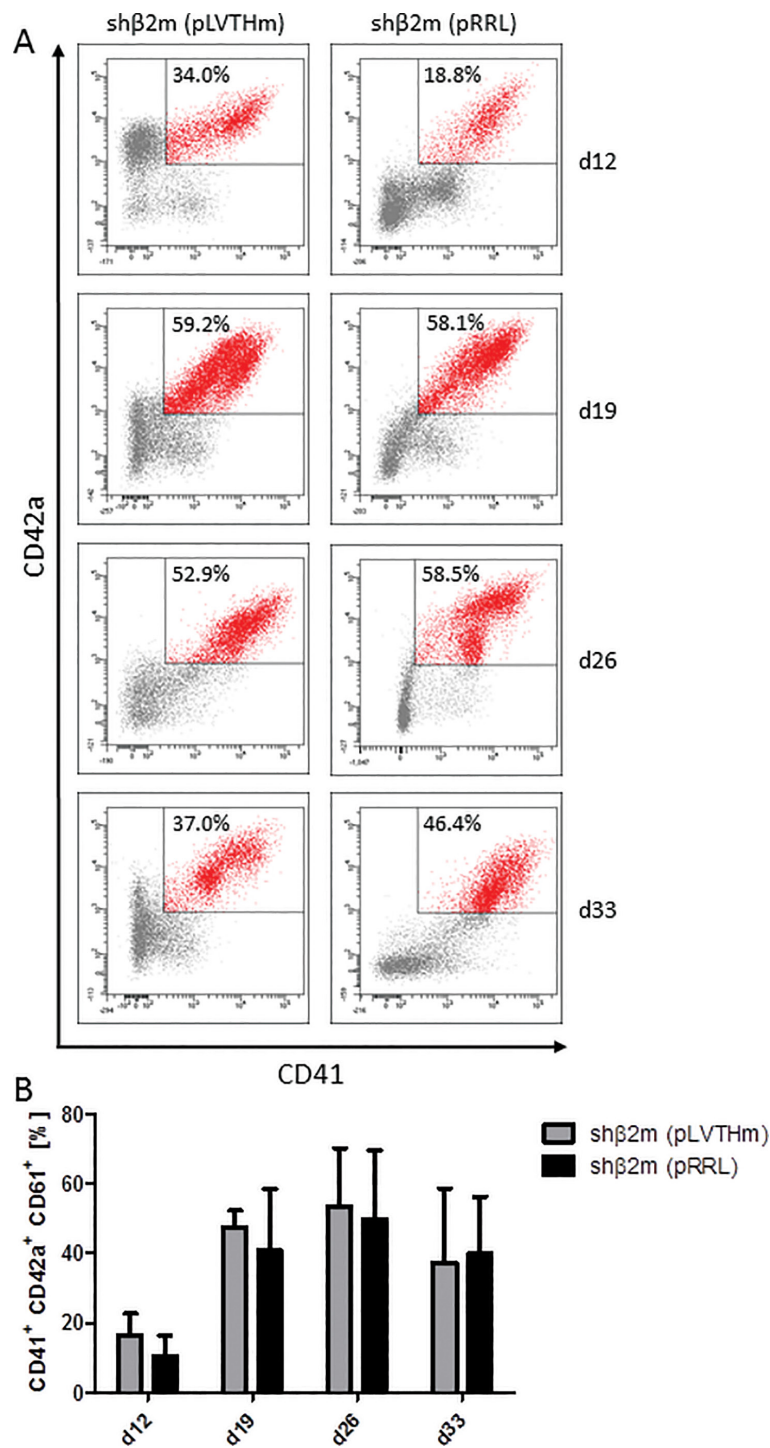

**Supplementary Figure S4.** Characterization of megakaryocytes (MKs) derived from shβ2m-expressing iPSCs. The iPSCs transduced with either pLVTHm or pRRL were cultured for 33 d as described above and analyzed for MK differentiation on four time points (once a week). (A) The MK markers CD41 (GPIIb) and CD42a (GPIX) were used to determine the amount of MKs in the population. Representative flow cytometry dot plots are shown for shβ2m-expressing MKs (pLVTHm and pRRL) for each time point. (B) Frequencies of CD41<sup>+</sup> CD42a<sup>+</sup> CD61<sup>+</sup> cells detected by flow cytometry are shown with mean and SD of four independent experiments.

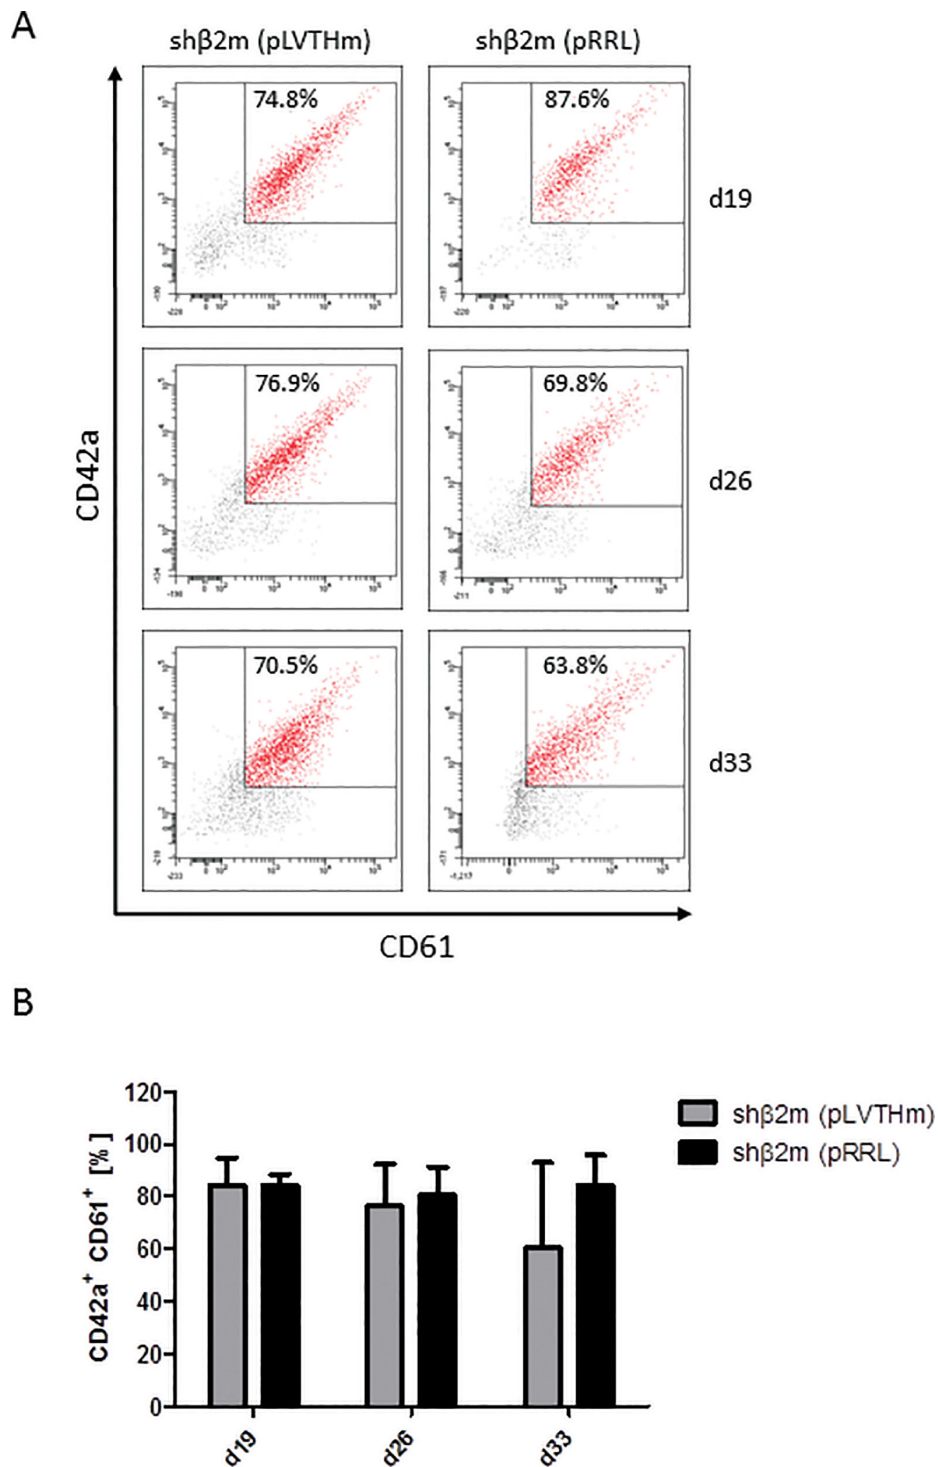

**Supplementary Figure S5.** Characterization of platelets (PLTs) derived from shβ2m-expressing iPSCs. The HLA-universal iPSCs (shβ2m-pLVTHm or shβ2m-pRRL) were cultured for 33 d and the supernatant was analyzed for PLTs at three time points starting at d 19. (A) PLTs were identified upon the expression of the typical PLT markers CD41 (GPIIb), CD42a (GPIX), and CD61 (GPIIla). Therefore the CD41<sup>+</sup> population was selected and the amount of CD42a<sup>+</sup>CD61<sup>+</sup> cells was determined. (B) Mean and SD of CD42a<sup>+</sup>CD61<sup>+</sup> cells of four independent experiments.
